# Supplementary material
Source: PubMed Central journal article supplement (PMC2645436)
Supplement: NIHMS87553-supplement-table.pdf [file NIHMS87553-supplement-table.pdf]

## Supplementary Table 1 PCR Primers

| <b>Real-time RT-PCR</b> |                             |
|-------------------------|-----------------------------|
| PD-1 Forward            | 5'-CGTCCCTCAGTCAAGAGGAG     |
| PD-1 Reverse            | 5'-GTCCCTAGAAGTGCCCAACA     |
| 18s Forward             | 5'-GTAACCCGTTGAACCCATT      |
| 18s Reverse             | 5'-CCATCCAATCGGTAGTAGCCG    |
| <b>PCR-based DHS</b>    |                             |
| Set I Forward           | 5'-CGACTTGTGTGCATGCATAGTACC |
| Set I Reverse           | 5'-GAGGTCCTTTCACTCTCCACG    |
| Set II Forward          | 5'-CCAGCTATCCCACATGCTCCC    |
| Set II Reverse          | 5'-GGACTGAGGAAAGTTGACTGG    |
| Set III Forward         | 5'-GGCAGTGTCGCCTTCAGTAGC    |
| Set III Reverse         | 5'-CTCGACACCCACCCTCCAAAG    |
| Control Forward         | 5'-TAGCACATAACAGCGGTAGATTAC |
| Control Reverse         | 5'-CCCAAGTTTGAGACAAGCAGAC   |
| <b>ChIP</b>             |                             |
| CR-B Forward            | 5'-GGCAGTGTCGCCTTCAGTAGC    |
| CR-B Reverse            | 5'-CCACCTCTAGTTGCCTGTTCTC   |
| CR-C Forward            | 5'-CCTCACCTCCTGCTTGTCTCTC   |
| CR-C Reverse            | 5'-GTGAGACCCACACATCTCATTGC  |
| Set I Forward           | 5'-CAGAGCAGATCATGAGGACTGG   |
| Set I Reverse           | 5'-GAGGTCCTTTCACTCTCCACG    |
| Set II Forward          | 5'-CCTCACCTCCTGCTTGTCTCTC   |
| Set II Reverse          | 5'-GTGAGACCCACACATCTCATTGC  |
| Set III Forward         | 5'-CCAGCTATCCCACATGCTCCC    |
| Set III Reverse         | 5'-GGGCAGCAGATCCAGCATCTTG   |
| Set IV Forward          | 5'-CTCTGACTAGCTGTCCTTGCCTC  |
| Set IV Reverse          | 5'-CTCGACACCCACCCTCCAAAG    |
| Set V Forward           | 5'-GGGTAGACAGCTGATTATACTC   |
| Set V Reverse           | 5'-CGTCAGTTGATCTTCTGTGTCC   |
| Set VI Forward          | 5'-CCTGCAATCACAGCATCGTAGC   |
| Set VI Reverse          | 5'-GTCTGAGTCTGTGTACATAACC   |
